# Supplementary material
Source: Springer Nature journal article supplement (https://www.springermedizin.de/resource/supplementary/12971_2014_178_MOESM2_ESM.pdf/9595132)
Supplement: MOESM2 [file 9595132]

% of junior students (grades 9 and 10) in Canada

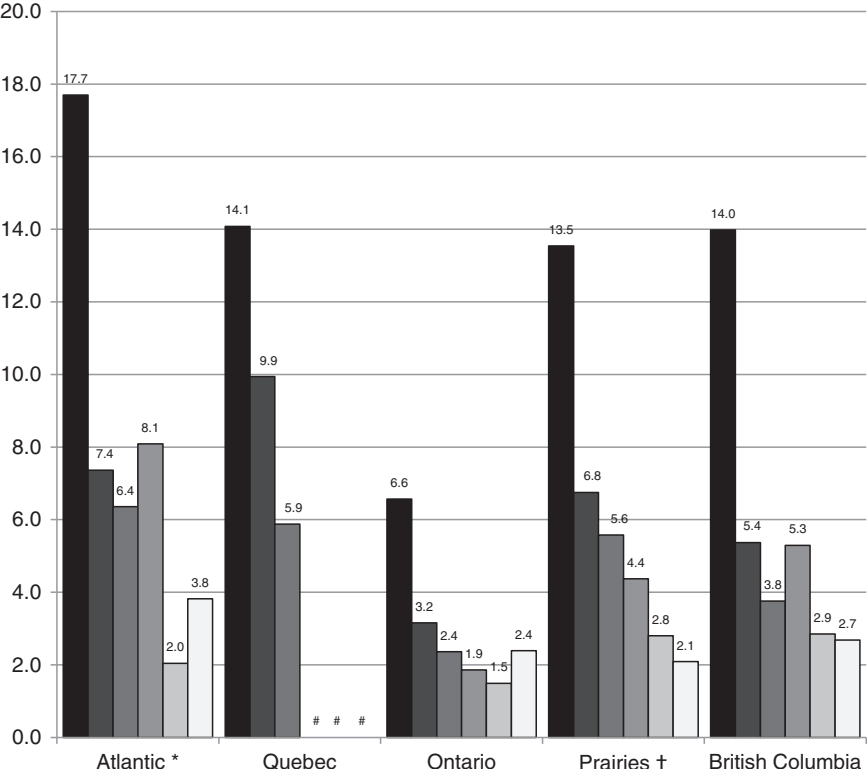

■ Manufactured cigarettes

■ Little cigars or cigarillos

■ Cigars

■ Roll-your-own cigarettes

□ Smokeless tobacco

□ Hookah
